# Supplementary material for: Synthesis of MnFe2O4@Mn–Co oxide core–shell nanoparticles and their excellent performance for heavy metal removal
Source: Royal Society of Chemistry journal article supplement (doi:10.1039/c3dt51310f), 2013-01-01
Supplement: c3dt51310f.pdf [file c3dt51310f.pdf]

**Electronic Supplementary Information for:**

**Synthesis of  $\text{MnFe}_2\text{O}_4@$ Mn-Co oxide core-shell nanoparticles and their excellent performance for heavy metal removal**

Ma Zichuan,<sup>a</sup> Dongyuan Zhao,<sup>a</sup> Chang Yongfang,<sup>b</sup> Xing Shengtao,<sup>\*a</sup> Wu Yinsu<sup>a</sup> and Gao

Yuanzhe<sup>a</sup>

<sup>a</sup> College of Chemistry and Material Sciences, Hebei Normal University, Shijiazhuang

050024, China

<sup>b</sup> College of Chemical Technology, Shijiazhuang University, Shijiazhuang 050035, China

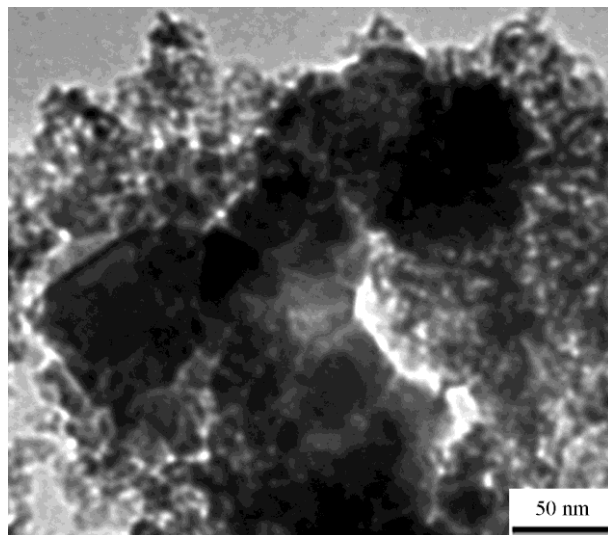

**Figure S1.** HRTEM image of MnFe<sub>2</sub>O<sub>4</sub>@Mn-Co oxide.

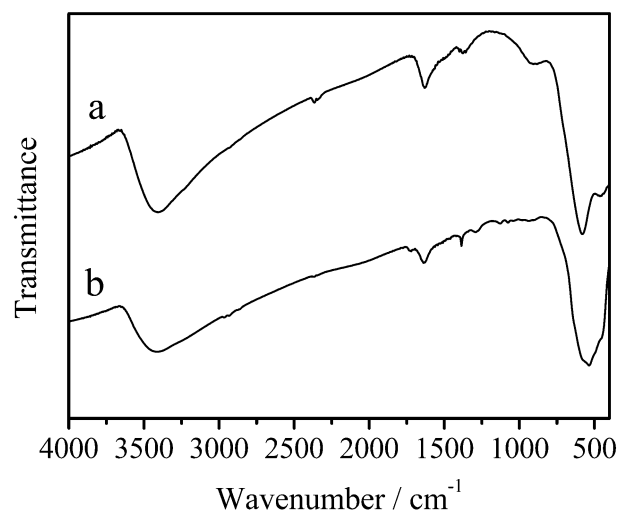

**Figure S2.** FTIR spectra of (a) MnFe<sub>2</sub>O<sub>4</sub> and (b) MnFe<sub>2</sub>O<sub>4</sub>@Mn-Co oxide.

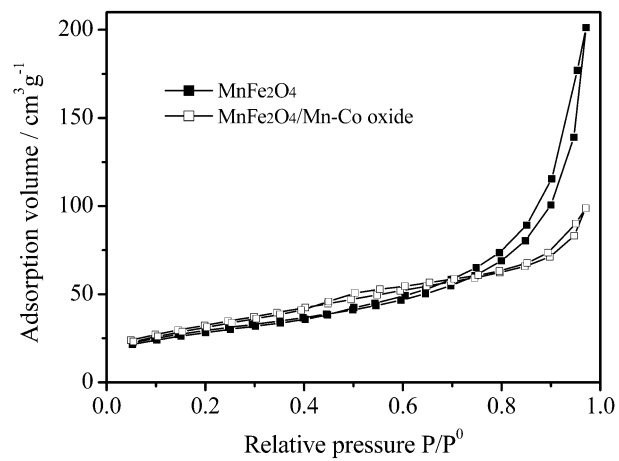

**Figure S3.** Nitrogen adsorption–desorption isotherms of MnFe<sub>2</sub>O<sub>4</sub> and MnFe<sub>2</sub>O<sub>4</sub>@Mn-Co oxide.

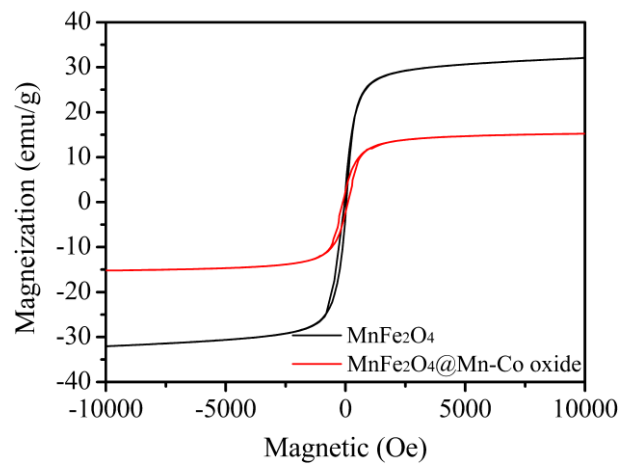

**Figure S4.** Room-temperature magnetization loops of of MnFe<sub>2</sub>O<sub>4</sub> and MnFe<sub>2</sub>O<sub>4</sub>@Mn-Co oxide.

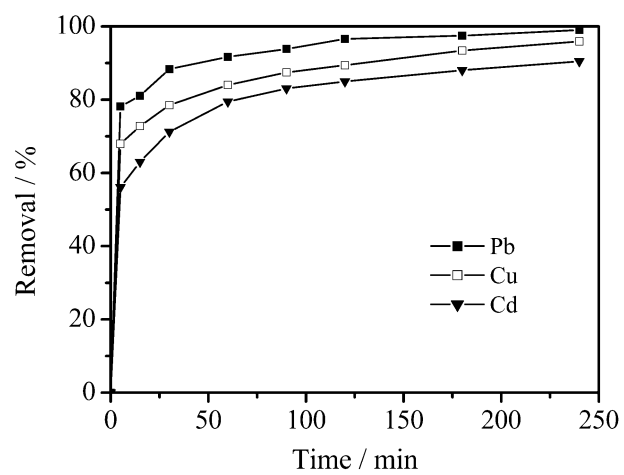

**Figure S5.** Adsorption kinetics curves of heavy metals on  $\text{MnFe}_2\text{O}_4@\text{Mn-Co}$  oxide

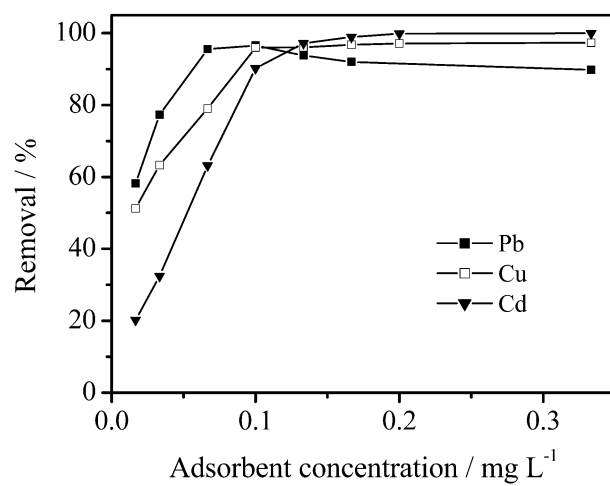

**Figure S6.** Effects of adsorbent concentrations on heavy metals removal.

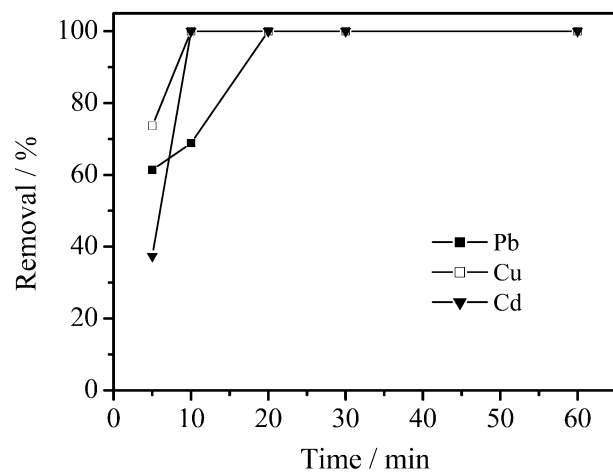

**Figure S7.** The removal efficiencies of mixed metal ions by  $\text{MnFe}_2\text{O}_4@\text{Mn-Co}$  oxide. The concentration of each metal ion was  $5 \text{ mg L}^{-1}$ .
